# Supplementary material
Source: Springer Nature journal article supplement (https://www.springermedizin.de/resource/supplementary/12939_2002_3_MOESM2_ESM.pdf/9550554)

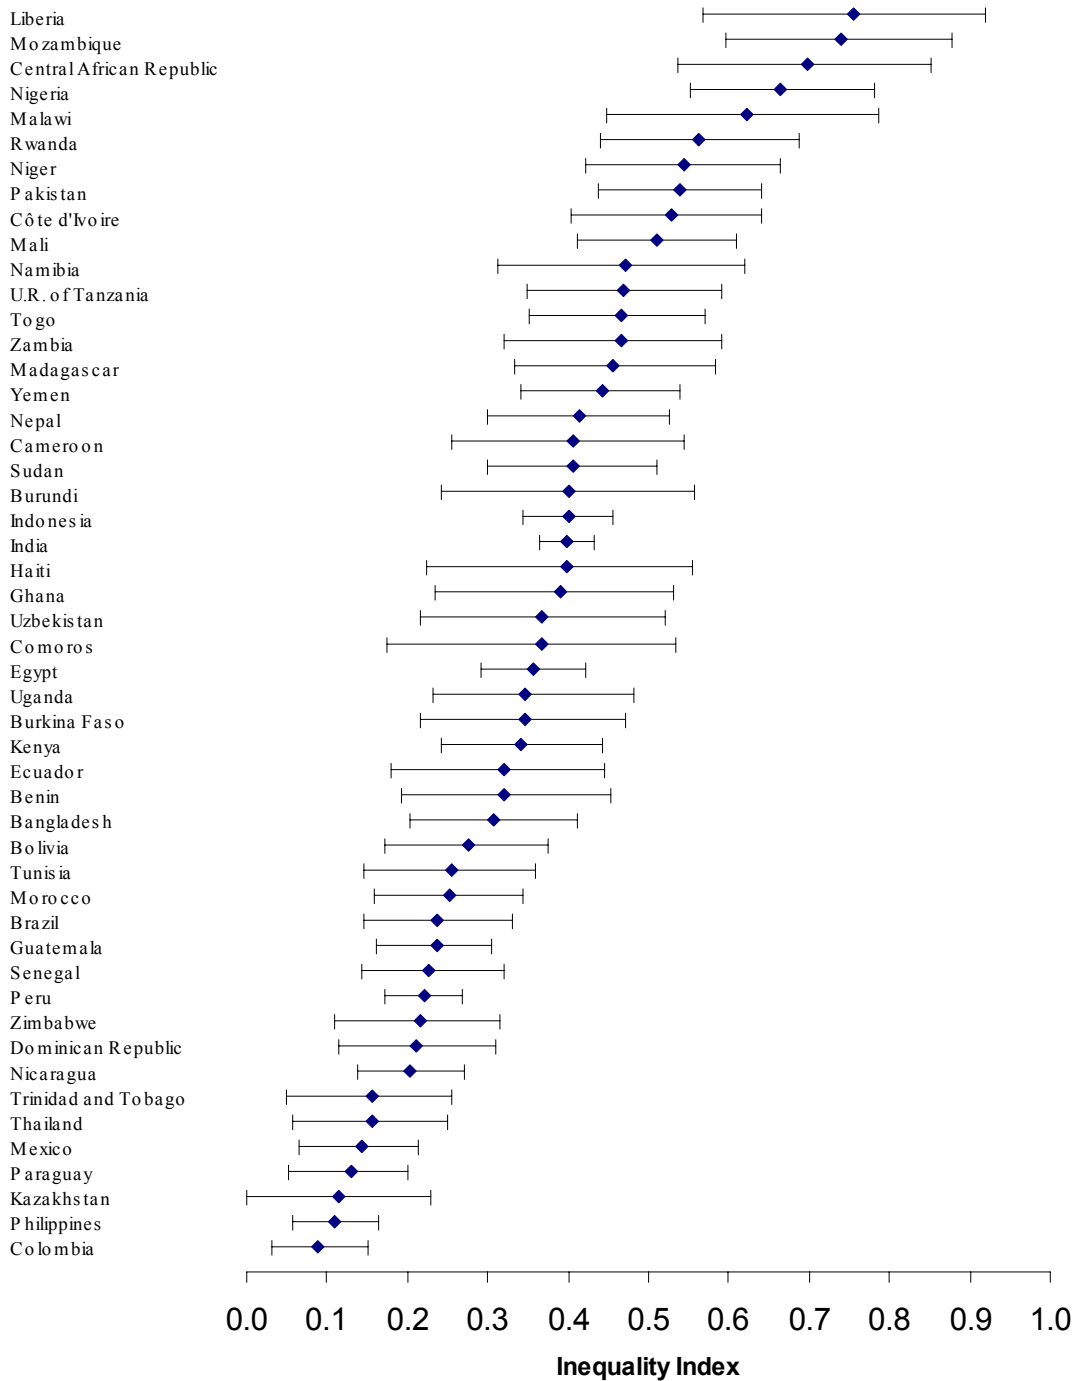

Supplement: MOESM2 [file 9550554]
